# Supplementary material for: Essential Oils of Melaleuca, Citrus, Cupressus, and Litsea for the Management of Infections Caused by Candida Species: A Systematic Review
Source: MDPI journal article supplement (doi:10.3390/pharmaceutics13101700), 2021-10-15
Supplement: s1 [file s1]

# Supplementary Materials: Essential Oils of *Melaleuca*, *Citrus*, *Cupressus*, and *Litsea* for the Management of Infections Caused by *Candida* Species: A Systematic Review

Rafael Alves da Silva, Flávia Maria Pinto Monteiro Antonietti, Denise Von Dolinger de Brito Röder and Reginaldo dos Santos Pedrosa

**Table S1.** Anti-*Candida* Activity of *Melaleuca* spp. essential oils and their main components.

| <i>Melaleuca</i> Species                         | Part of the Plant | Antifungal Activity                 |                                    |                                        |        | Major Components (>1%)                        | Reference                                                                                                                                                                                                                                 |
|--------------------------------------------------|-------------------|-------------------------------------|------------------------------------|----------------------------------------|--------|-----------------------------------------------|-------------------------------------------------------------------------------------------------------------------------------------------------------------------------------------------------------------------------------------------|
|                                                  |                   | Method of Antifungal Susceptibility | Species of <i>Candida</i>          | Agar Diffusion or MIC *                | MFC ** | Comparison Drug Results                       |                                                                                                                                                                                                                                           |
| <i>M. alternifolia</i>                           | Leaves            | Disk diffusion                      | <i>C. albicans</i> (RCMB 05035)    | 20.3 ± 0.44 mm                         | -      | Amphotericin B (5 µg/mL/disk): 21.9 ± 0.12 mm | Terpinen-4-ol (44.41%), γ-terpinene (21.89%), α-terpinene (6.84%), α-terpineol (6.46%), α-pinene (2.87%), limonene (2.86%), aromadendrene (2.86%), o-cymene (o-cymol) (2.81%), Terpinolene (2.45%), eucalyptol (1,8-cineole) (1.31%). [1] |
| <i>M. alternifolia</i><br><i>M. alternifolia</i> | Leaves            | Disk diffusion                      | <i>C. albicans</i> (ATCC 90028)    | (30 mg/10 µL/disk):<br>19.33 ± 0.57 mm | -      | Amphotericin B (10 µg/disk): 11 mm            | Terpinen-4-ol (40.44%), γ-terpinene (19.54%), α-terpinene (7.69%), 1,8-cineole (5.20%), <i>p</i> -cymene (4.74%), α-terpineol (3.31%), α-terpinolene (3.09%), α-pinene (2.67%). [2]                                                       |
|                                                  |                   |                                     | <i>C. albicans</i> (ATCC 2091)     | (30 mg/10 µL/disk):<br>21 ± 1 mm       | -      | Amphotericin B (10 µg/disk): 14.66 ± 0.57 mm  |                                                                                                                                                                                                                                           |
|                                                  |                   |                                     | <i>C. albicans</i>                 | (30 mg/10 µL/disk):<br>12–25 mm        | -      | Amphotericin B (10 µg/disk): 9.66–11.66 mm    |                                                                                                                                                                                                                                           |
|                                                  |                   |                                     | <i>C. atlantica</i> (CECT 1435)    | (30 mg/10 µL/disk):<br>21 ± 1 mm       | -      | Amphotericin B (10 µg/disk): 11 ± 0 mm        |                                                                                                                                                                                                                                           |
|                                                  |                   |                                     | <i>C. dublinensis</i> (CECT 11455) | (30 mg/10 µL/disk):<br>15 ± 0 mm       | -      | Amphotericin B (10 µg/disk): 11.33±0.57 mm    |                                                                                                                                                                                                                                           |
|                                                  |                   |                                     | <i>C. famata</i> (CECT 11957)      | (30 mg/10 µL/disk):                    | -      | Amphotericin B                                |                                                                                                                                                                                                                                           |

|                                   |        |                     |                                 |                                            |                                                  |                                        |
|-----------------------------------|--------|---------------------|---------------------------------|--------------------------------------------|--------------------------------------------------|----------------------------------------|
|                                   |        |                     |                                 | disk):<br>20.66 ± 0.57 mm                  | (10 µg/disk): 12.33±0.57 mm                      |                                        |
|                                   |        |                     |                                 | (30 mg/10 µL/<br>disk):<br>14.33 ± 0.57 mm | Amphotericin B<br>(10 µg/disk): 14.33 ± 0.57 mm  |                                        |
| <i>C. glabrata</i> (ATCC 90030)   |        |                     |                                 | -                                          |                                                  |                                        |
|                                   |        |                     |                                 | (30 mg/10 µL/<br>disk):<br>11.66–12 mm     | Amphotericin B<br>(10 µg/disk): 10.66 ± 10.33 mm |                                        |
| <i>C. intermedia</i> (CECT 11869) |        |                     |                                 | -                                          | Amphotericin B<br>(10 µg/disk): 12 ± 0 mm        |                                        |
|                                   |        |                     |                                 | (30 mg/10 µL/<br>disk):<br>19.33 ± 1.15 mm | Amphotericin B<br>(10 µg/disk): 10.66 ± 1.15 mm  |                                        |
| <i>C. kefyr</i>                   |        |                     |                                 | -                                          | Amphotericin B<br>(10 µg/disk): 9.66 ± 0.57 mm   |                                        |
|                                   |        |                     |                                 | (30 mg/10 µL/<br>disk):<br>15.33 ± 0.57 mm | Amphotericin B<br>(10 µg/disk): 12.33 ± 1.15 mm  |                                        |
| <i>C. lusitaniae</i> (CECT 11455) |        |                     |                                 | -                                          | Amphotericin B<br>(10 µg/disk): 12.66 ± 1.15 mm  |                                        |
|                                   |        |                     |                                 | (30 mg/10 µL/<br>disk):<br>14.66 ± 0.57 mm | Amphotericin B<br>(10 µg/disk): 11 ± 1 mm        |                                        |
| <i>C. parapsilosis</i>            |        |                     |                                 | -                                          | Amphotericin B<br>(10 µg/disk): 12 ± 1 mm        |                                        |
|                                   |        |                     |                                 | (30 mg/ 10 µL/disk):<br>16.33±0.57 mm      |                                                  |                                        |
|                                   |        |                     |                                 |                                            |                                                  |                                        |
| <i>M. alternifolia</i>            | Leaves | Broth microdilution | <i>C. albicans</i> (ATCC 90028) | 0.312 mg/mL                                | >10 mg/mL                                        | Amphotericin B (MIC): 0.781 mg/mL      |
|                                   |        |                     | <i>C. albicans</i> (ATCC 2091)  | 0.0097 mg/mL                               | >10 mg/mL                                        | Amphotericin B (MIC): 0.781 mg/mL      |
|                                   |        |                     | <i>C. albicans</i>              | 0.0097–5 mg/mL                             | 5 to > 10 mg/mL                                  | Amphotericin B (MIC): 0.04–1.562 mg/mL |
|                                   |        |                     | <i>C. atlantica</i> CECT 1435   | 0.0097 mg/mL                               | 10 mg/mL                                         | Amphotericin B (MIC): 0.0097 mg/mL     |
|                                   |        |                     | <i>C. dublinensis</i>           | 0.0195 mg/mL                               | 5 mg/mL                                          | Amphotericin B (MIC):                  |

|                        |                      |                        |                                                                           |                          |                        |                                                         |                                                                                                                                                                                                                   |                       |
|------------------------|----------------------|------------------------|---------------------------------------------------------------------------|--------------------------|------------------------|---------------------------------------------------------|-------------------------------------------------------------------------------------------------------------------------------------------------------------------------------------------------------------------|-----------------------|
|                        |                      |                        | <i>C. famata</i> CECT 11957                                               | 0.0097 mg/mL             | >10 mg/mL              | 0.0097 mg/mL<br>Amphotericin B (MIC):<br>0.0097 mg/mL   |                                                                                                                                                                                                                   |                       |
|                        |                      |                        | <i>C. glabrata</i> (ATCC 90030)                                           | 0.625 mg/mL              | 10 mg/mL               | Amphotericin B (MIC):<br>1.562 mg/mL                    |                                                                                                                                                                                                                   |                       |
|                        |                      |                        | <i>C. glabrata</i>                                                        | 0.0097 – 0.0195<br>mg/mL | 2.5–10 mg/mL           | Amphotericin B (MIC):<br>0.195–0.39 mg/mL               |                                                                                                                                                                                                                   |                       |
|                        |                      |                        | <i>C. intermedia</i> CECT<br>11869                                        | 0.0097 mg/mL             | > 10 mg/mL             | Amphotericin B (MIC):<br>0.0097 mg/mL                   |                                                                                                                                                                                                                   |                       |
|                        |                      |                        | <i>C. kefyr</i> (CECT 1017)                                               | 0.0097 mg/mL             | 5 mg/mL                | Amphotericin B (MIC):<br>0.39 mg/mL                     |                                                                                                                                                                                                                   |                       |
|                        |                      |                        | <i>C. kefyr</i>                                                           | 0.0097 mg/mL             | 10 mg/mL               | Amphotericin B (MIC):<br>1.562 mg/mL                    |                                                                                                                                                                                                                   |                       |
|                        |                      |                        | <i>C. lusitaniae</i>                                                      | 0.0097 mg/mL             | >10 mg/mL              | Amphotericin B (MIC):<br>0.0097 mg/mL                   |                                                                                                                                                                                                                   |                       |
|                        |                      |                        | <i>C. maritima</i> CECT 1435                                              | 0.0097 mg/mL             | 10 mg/mL               | Amphotericin B (MIC):<br>0.0097 mg/mL                   |                                                                                                                                                                                                                   |                       |
|                        |                      |                        | <i>C. parapsilosis</i>                                                    | 5 mg/mL                  | >10 mg/mL              | Amphotericin B (MIC):<br>0.195 mg/mL                    |                                                                                                                                                                                                                   |                       |
|                        |                      |                        | <i>C. sake</i> CECT 1044                                                  | 0.0097 mg/mL             | 10 mg/mL               | Amphotericin B (MIC):<br>0.0097 mg/mL                   |                                                                                                                                                                                                                   |                       |
|                        |                      |                        | <i>M. alternifolia</i>                                                    | Leaves                   | Broth<br>microdilution | <i>C. albicans</i> (ATCC 10231)                         |                                                                                                                                                                                                                   | 0.125% ( <i>v/v</i> ) |
| <i>C. albicans</i>     | 0.19% ( <i>v/v</i> ) | 0.37% ( <i>v/v</i> )   |                                                                           |                          |                        | Fluconazole (MIC): 244<br>µg/mL; (MFC): 254.48<br>µg/mL |                                                                                                                                                                                                                   |                       |
| <i>M. alternifolia</i> | -                    | Broth<br>microdilution | <i>C. albicans</i>                                                        | 0.25–2.0% ( <i>v/v</i> ) | -                      | -                                                       | Terpinen-4-ol (41.9%), γ-terpinene (17.8%),<br>α-terpinene (8%), <i>p</i> -cymene (4.6%),<br>1,8-cineole (4.4%), α-terpineol (3.8%),<br>α-terpinolene (3%), α-pinene (2.4%), limo-<br>nene (1.8%), ledene (1.2%). | [4]                   |
|                        |                      |                        | <i>C. albicans</i> – Fluconazole<br>Resistant                             | 0.5% ( <i>v/v</i> )      | -                      | -                                                       |                                                                                                                                                                                                                   |                       |
|                        |                      |                        | <i>C. albicans</i> – Fluconazole,<br>voriconzol Resistant                 | 0.12–1.0% ( <i>v/v</i> ) | -                      | -                                                       |                                                                                                                                                                                                                   |                       |
|                        |                      |                        | <i>C. albicans</i> - Fluconazol,<br>Nystatin and<br>Voriconazol Resistant | 1% ( <i>v/v</i> )        | -                      | -                                                       |                                                                                                                                                                                                                   |                       |
|                        |                      |                        | <i>C. boidinii</i> - Fluconazole<br>Resistent                             | 0.12% ( <i>v/v</i> )     | -                      | -                                                       |                                                                                                                                                                                                                   |                       |

|                        |                     |                        |                                                                                  |                              |   |                                                                                                         |                                                                                                                                                                                                                   |     |
|------------------------|---------------------|------------------------|----------------------------------------------------------------------------------|------------------------------|---|---------------------------------------------------------------------------------------------------------|-------------------------------------------------------------------------------------------------------------------------------------------------------------------------------------------------------------------|-----|
|                        |                     |                        | <i>C. boidinii</i>                                                               | 0.12–0.25% (v/v)             | - | -                                                                                                       |                                                                                                                                                                                                                   |     |
|                        |                     |                        | <i>C. colliculosa</i>                                                            | 0.25% (v/v)                  | - | -                                                                                                       |                                                                                                                                                                                                                   |     |
|                        |                     |                        | <i>C. famata</i>                                                                 | 0.25–0.5% (v/v)              | - | -                                                                                                       |                                                                                                                                                                                                                   |     |
|                        |                     |                        | <i>C. glabrata</i> - Fluconazole,<br>voriconazol Resistant                       | 0.25% (v/v)                  | - | -                                                                                                       |                                                                                                                                                                                                                   |     |
|                        |                     |                        | <i>C. krusei</i>                                                                 | 0.12–0.25% (v/v)             | - | -                                                                                                       |                                                                                                                                                                                                                   |     |
|                        |                     |                        | <i>C. lusitaniae</i>                                                             | 0.25–1.0% (v/v)              | - | -                                                                                                       |                                                                                                                                                                                                                   |     |
|                        |                     |                        | <i>C. pelliculosa</i> - Nystatin<br>Resistant                                    | 0.5% (v/v)                   | - | -                                                                                                       |                                                                                                                                                                                                                   |     |
|                        |                     |                        | <i>C. rugosa</i> – Fluconazole<br>Resistant                                      | 0.12% (v/v)                  | - | -                                                                                                       |                                                                                                                                                                                                                   |     |
|                        |                     |                        | <i>C. tropicalis</i> -<br>Fluconazol, Nystatin<br>and Voriconazol Re-<br>sistent | 8% (v/v)                     | - | -                                                                                                       |                                                                                                                                                                                                                   |     |
| <i>M. alternifolia</i> | -                   | Broth<br>microdilution | <i>C. albicans</i> (ATCC 18804)                                                  | 625 µg/mL                    | - | -                                                                                                       | Terpinen-4-ol (47.5%), γ -terpinene (20.2%),<br>α-terpinene (8.6%).                                                                                                                                               | [5] |
| <i>M. alternifolia</i> | Leaves and<br>twigs | Broth<br>microdilution | <i>C. albicans</i> (NYCY 1363)                                                   | 0.2% (v/v) / 1.8<br>(g/L)    | - | -                                                                                                       | -                                                                                                                                                                                                                 | [6] |
|                        |                     |                        | <i>C. albicans</i> (135 BM2/94)                                                  | 0.2% (v/v) /1.8<br>(g/L)     | - | -                                                                                                       |                                                                                                                                                                                                                   |     |
| <i>M. alternifolia</i> | -                   | Broth<br>microdilution | <i>C. albicans</i> (ATCC 10231)                                                  | 0.5% (v/v)                   | - | -                                                                                                       | Terpinen-4-ol (41.9%), γ-terpinene (17.8%),<br>α-terpinene (8%), <i>p</i> -cymene (4.6%),<br>1,8-cineole (4.4%), α-terpineol (3.8%),<br>α-terpinolene (3%), α-pinene (2.4%), limo-<br>nene (1.8%), ledene (1.2%). | [7] |
| <i>M. alternifolia</i> | -                   | Broth<br>microdilution | <i>C. albicans</i> (ATCC 18804)                                                  | 0.195% (v/v)<br>(1.95 mg/mL) | - | -                                                                                                       | Terpinen-4-ol (42.8%), γ-terpinene (20.4%),<br><i>p</i> -cymene (9.6%), α-terpinene (7.9%),<br>1,8-cineole (3%), α-terpineol, (2.8%),<br>α-pinene (2.4%).                                                         | [8] |
| <i>M. alternifolia</i> | -                   | Broth<br>microdilution | <i>C. albicans</i> (ATCC 14053)                                                  | 2–4% (v/v)                   | - | Clotrimazole (MIC): >64<br>µg/mL<br>Fluconazole (MIC): >64<br>µg/mL<br>Itraconazole (MIC): >64<br>µg/mL | α-Terpinen (8.35%), 1,8-cineole (3.39%),<br>α-terpineole (2.7%), α-pinene (2.63 %),<br>aromadendrene (1.65%).                                                                                                     | [9] |

|                        |   |                     |                                                        |                         |                   |                                                                                                            |                                                                                                                                                                                                                                               |      |
|------------------------|---|---------------------|--------------------------------------------------------|-------------------------|-------------------|------------------------------------------------------------------------------------------------------------|-----------------------------------------------------------------------------------------------------------------------------------------------------------------------------------------------------------------------------------------------|------|
| <i>M. alternifolia</i> | - | Broth microdilution | <i>C. albicans</i>                                     | 0.50–1% (v/v)           | -                 | -                                                                                                          | -                                                                                                                                                                                                                                             | [10] |
| <i>M. alternifolia</i> | - | Broth microdilution | <i>C. albicans</i> (TIMM 3163)                         | 20 mg/mL (20,000 µg/mL) | -                 | Fluconazole (MIC): 1 µg/mL                                                                                 | Terpinen-4-ol (37.7%), γ-terpinene (21.25%), α-terpinene (10.5%), terpinolene (3.65%), 1–8 cineole (3.65%), α-terpinenol (2.75%), α-pinene (2.65%), <i>p</i> -cymene (2.3%).                                                                  | [11] |
|                        |   |                     | <i>C. albicans</i> (TIMM 2640) - Fluconazole Resistant | 5 mg/mL (5000 µg/mL)    | -                 | Fluconazole (MIC): >64 µg/mL                                                                               |                                                                                                                                                                                                                                               |      |
| <i>M. alternifolia</i> | - | Broth microdilution | <i>C. albicans</i> – Fluconazole resistant             | 0.156–1.25% (v/v)       | 0.312–1.25% (v/v) | -                                                                                                          | -                                                                                                                                                                                                                                             | [12] |
|                        |   |                     | <i>C. glabrata</i> – Fluconazole resistant.            | 0.156–1.25% (v/v)       | 0.625–1.25% (v/v) | -                                                                                                          |                                                                                                                                                                                                                                               |      |
|                        |   |                     | <i>C. krusei</i> – Fluconazole resistant.              | 0.312–0.625% (v/v)      | 0.312–1.25% (v/v) | -                                                                                                          |                                                                                                                                                                                                                                               |      |
| <i>M. alternifolia</i> | - | Broth microdilution | <i>C. glabrata</i> (ATCC 2950)                         | 0.75–2.5% (v/v)         | -                 | Amphotericin B (MIC): 0.0018% (v/v)                                                                        | Terpinen-4-ol (40–50% (v/v)); γ-terpinene (15–25% (v/v)); α-terpinene (5–15% (v/v)); Limonene + 1,8-cineole (5–10% (v/v)); α-pinene (0–10% (v/v)), α-terpinen-4-ol (0–10% (v/v)); <i>p</i> -cymene (5–<10% (v/v)); terpinolene (0–<5% (v/v)). | [13] |
| <i>M. alternifolia</i> | - | Broth microdilution | <i>C. glabrata</i> (ATCC 15126)                        | -                       | -                 | Clotrimazole (MIC): 8 µg/mL<br>Fluconazole (MIC): 8 µg/mL<br>Itraconazole (MIC): 1 µg/mL                   | -                                                                                                                                                                                                                                             | [14] |
| <i>M. alternifolia</i> | - | Broth microdilution | <i>C. glabrata</i>                                     | 4% (v/v)                | -                 | Clotrimazole (MIC): 0.062–8 µg/mL<br>Fluconazole (MIC): 2–>64 µg/mL<br>Itraconazole (MIC): 0.125–>64 µg/mL |                                                                                                                                                                                                                                               |      |
| <i>M. alternifolia</i> | - | Broth microdilution | <i>C. krusei</i>                                       | 0.5% (v/v)              | 0.5% (v/v)        | -                                                                                                          | -                                                                                                                                                                                                                                             | [15] |
| <i>M. alternifolia</i> | - | Broth microdilution | <i>C. albicans</i> (SC 5314)                           | >2000 µg/mL             | -                 | -                                                                                                          | -                                                                                                                                                                                                                                             | [16] |
|                        |   |                     | <i>C. glabrata</i> (ATCC 2001)                         | >2000 µg/mL             | -                 | -                                                                                                          |                                                                                                                                                                                                                                               |      |

|                       |            |                     |                                      |             |   |                         |                                                                                                                                                                                                                                                                                                                                                                                                                                                                                    |
|-----------------------|------------|---------------------|--------------------------------------|-------------|---|-------------------------|------------------------------------------------------------------------------------------------------------------------------------------------------------------------------------------------------------------------------------------------------------------------------------------------------------------------------------------------------------------------------------------------------------------------------------------------------------------------------------|
|                       |            |                     | <i>C. krusei</i> (ATCC 62580)        | 2000 µg/mL  | - | -                       |                                                                                                                                                                                                                                                                                                                                                                                                                                                                                    |
|                       |            |                     | <i>C. orthopsilosis</i> (ATCC 96141) | >2000 µg/mL | - | -                       |                                                                                                                                                                                                                                                                                                                                                                                                                                                                                    |
|                       |            |                     | <i>C. parapsilosis</i> (ATCC 22019)  | >2000 µg/mL | - | -                       |                                                                                                                                                                                                                                                                                                                                                                                                                                                                                    |
|                       |            |                     | <i>C. parapsilosis</i> (ATCC 96141)  | >2000 µg/mL | - | -                       |                                                                                                                                                                                                                                                                                                                                                                                                                                                                                    |
|                       |            |                     | <i>C. tropicalis</i> (ATCC 13803)    | >2000 µg/mL | - | -                       |                                                                                                                                                                                                                                                                                                                                                                                                                                                                                    |
| <i>M. leucadendra</i> | Young Leaf | Broth microdilution | <i>C. albicans</i> (ATCC 10231)      | -           | - | Nystatin (MIC): 8 µg/mL | <p>α-Eudesmol (21.2%), guaiol (12.5%), bulnesol (5.3%), Linalool (4.9%), <i>p</i>-cymene (3.9%), γ-eudesmol (3.9%), (E)-caryophyllene (3.8%), cis-cadin-4-en-7-ol (3.5%), eremoligenol (3.4%), terpinolene (3%), α-humulene (2.8%), β-selinene (2.4%), γ-terpinene (2.2%), α-selinene (2.1%), selina-6-en-4β-ol (2%), selin-11-en-4α-ol (1.9%), caryophyllene oxide (1.8%), <i>p</i>-cymen-8-ol (1%), δ-selinene (1%), hinesol (1%).</p>                                           |
| <i>M. leucadendra</i> | Old Leaf   | Broth microdilution | <i>C. albicans</i> (ATCC 10231)      | 128 µg/mL   | - | Nystatin (MIC): 8 µg/mL | <p>α-eudesmol (17.6%), guaiol (10.9%), (E)-caryophyllene (7%), 1,8-cineole (5.2%), linalool (5.1%), α-humulene (4.4%), β-selinene (3.7%), α-selinene (3.7%), bulnesol (3.6%), eremoligenol (3.4%), cis-cadin-4-en-7-ol (3%), γ-eudesmol (2.8%), caryophyllene oxide (2.3%), α-terpineol (1.8%), <i>p</i>-cymene (1.7%), terpinolene (1.6%), selina-6-en-4β-ol (1.6%), δ-selinene (1.6%), selin-11-en-4α-ol (1.5%), γ-terpinene (1.3%), α-amorphene (1.2%), γ-gurjunene (1.1%).</p> |
| <i>M. leucadendra</i> | Stem Bark  | Broth microdilution | <i>C. albicans</i> (ATCC 10231)      | 64 µg/mL    | - | Nystatin (MIC): 8 µg/mL | <p>α-eudesmol (24.1%), guaiol (11.3%), (E)-caryophyllene (5.5%), eremoligenol (4.9%), β-selinene (4.8%), α-selinene (3.6%), α-humulene (3.5%), γ-eudesmol (3.5%), bulnesol (3.3%), cis-cadin-4-en-7-ol (3.3%), caryophyllene oxide (3.3%), 1,8-cineole</p>                                                                                                                                                                                                                         |

[17]

|                         |             |                        |                                 |                              |   |                                                                                                    |                                                                                                                                                                                                                                                                                                                                                                                                                                                                                                                                                                                                                                                                                                         |
|-------------------------|-------------|------------------------|---------------------------------|------------------------------|---|----------------------------------------------------------------------------------------------------|---------------------------------------------------------------------------------------------------------------------------------------------------------------------------------------------------------------------------------------------------------------------------------------------------------------------------------------------------------------------------------------------------------------------------------------------------------------------------------------------------------------------------------------------------------------------------------------------------------------------------------------------------------------------------------------------------------|
|                         |             |                        |                                 |                              |   |                                                                                                    | (1.8%), selina-6-en-4 $\beta$ -ol (1.7%),<br>$\alpha$ -amorphene (1.5%), humulene epoxide II<br>(1.5%), linalool (1.4%), limonene (1.4%), <i>p</i> -<br>cymene (1.3%), selin-11-en-4 $\alpha$ -ol (1.3%),<br>hinesol (1.2%), $\gamma$ -gurjunene (1.1%),                                                                                                                                                                                                                                                                                                                                                                                                                                                |
| <i>M. leucadendra</i>   | Fruit       | Broth<br>microdilution | <i>C. albicans</i> (ATCC 10231) | 256 $\mu$ g/mL               | - | Nystatin (MIC): 8 $\mu$ g/mL                                                                       | $\alpha$ -eudesmol (30.7%), guaialol (10.4%), eremo-<br>ligenol (6.5%), $\gamma$ -eudesmol (5.3%), bulnesol<br>(4.4%), (E)-caryophyllene (4.3%),<br>cis-cadin-4-en-7-ol (3.5%), caryophyllene<br>oxide (3.2%), $\beta$ -selinene (3.1%), $\alpha$ -humulene<br>(2.8%), $\alpha$ -selinene (2.5%), selina-6-en-4 $\beta$ -ol<br>(2.2%), selin-11-en-4 $\alpha$ -ol (1.6%), hinesol<br>(1.6%), humulene epoxide II (1.3%).                                                                                                                                                                                                                                                                                |
| <i>M. leucadendra</i>   | Branch Tips | Broth<br>microdilution | <i>C. albicans</i> (ATCC 10231) | -                            | - | Nystatin (MIC): 8 $\mu$ g/mL                                                                       | $\alpha$ -Eudesmol (13.7%), <i>p</i> -cymene (8.7%),<br>guaialol (7.3%), (E)-caryophyllene (5.7%),<br>terpinolene (4.4%), $\beta$ -selinene (4.2%), linal-<br>ool (4.2%), $\alpha$ -selinene (4.1%), caryo-<br>phyllene oxide (4%), $\alpha$ -humulene (3.7%),<br>$\gamma$ -terpinene (3.3%), eremoligenol (2.7%),<br>bulnesol (2.2%), cis-cadin-4-en-7-ol (2.2%),<br>$\gamma$ -eudesmol (1.9%), humulene epoxide II<br>(1.6%), $\gamma$ -gurjunene (1.4%), $\alpha$ -pinene<br>(1.4%), $\delta$ -selinene (1.3%), $\alpha$ -thujene (1.2%),<br>selina-6-en-4 $\beta$ -ol (1.2%), $\alpha$ -amorphene<br>(1.2%), <i>p</i> -cymen-8-ol (1.2%), terpinen-4-ol<br>(1.1%), selin-11-en-4 $\alpha$ -ol (1%). |
| <i>M. quinquenervia</i> | Leaves      | Broth<br>microdilution | <i>C. albicans</i> (ATCC 10231) | 1 mg/mL<br>(1000 $\mu$ g/mL) | - | Amphotericin B (MIC):<br>4 mg/mL (4000 $\mu$ g/mL)<br>Nystatin (MIC):<br>2 mg/mL (2000 $\mu$ g/mL) | 1,8-Cineole (40.3%), carveol (27.15%),<br>myrtenol (9.43%), eucarvone (5.7%),<br>camphor (5.66%), nopinone (1.9%), sabinene<br>hydrate (1.7%).                                                                                                                                                                                                                                                                                                                                                                                                                                                                                                                                                          |

---

|                    |                         |   |                                                                                          |
|--------------------|-------------------------|---|------------------------------------------------------------------------------------------|
| <i>C. albicans</i> | 4 mg/mL<br>(4000 µg/mL) | - | Amphotericin B (MIC):<br>4 mg/mL (4000 µg/mL)<br>Nystatin (MIC):<br>2 mg/mL (2000 µg/mL) |
|--------------------|-------------------------|---|------------------------------------------------------------------------------------------|

---

|                                 |                         |   |                                                                                          |
|---------------------------------|-------------------------|---|------------------------------------------------------------------------------------------|
| <i>C. tropicalis</i> (ATCC 750) | 1 mg/mL<br>(1000 µg/mL) | - | Amphotericin B (MIC):<br>4 mg/mL (4000 µg/mL)<br>Nystatin (MIC):<br>2 mg/mL (2000 µg/mL) |
|---------------------------------|-------------------------|---|------------------------------------------------------------------------------------------|

---

Note: Diameter of inhibition zones includes diameter of disks (6 mm). \* MIC: Minimum inhibitory concentration. \*\* MFC: Minimum fungicidal concentration. ATCC: American Type Culture Collection.



**Table S2.** Anti-*Candida* activity of *Citrus* spp. essential oils and their main components.

| <i>Citrus</i> Species  | Part of the Plant | Antifungal Activity                 |                                      |                         |        | Major Components (>1%)                                                            | Reference                                                                                                                                                                                                            |
|------------------------|-------------------|-------------------------------------|--------------------------------------|-------------------------|--------|-----------------------------------------------------------------------------------|----------------------------------------------------------------------------------------------------------------------------------------------------------------------------------------------------------------------|
|                        |                   | Method of Antifungal Susceptibility | Species of <i>Candida</i>            | Agar Diffusion or MIC * | MFC ** | Comparison Drug Results                                                           |                                                                                                                                                                                                                      |
| <i>C. aurantifolia</i> | -                 | Broth micro-dilution                | <i>C. albicans</i> (ATCC 18804)      | 625 µL/mL               | -      | -                                                                                 | Limonene (51.9%), β-pinene (18.8%), γ-terpinene (8.1%).                                                                                                                                                              |
| <i>C. aurantium</i>    | -                 | Broth micro-dilution                | <i>C. albicans</i> (ATCC 18804)      | 625 µL/mL               | -      | -                                                                                 | Linalyl acetate (51.5%), linalool (25.4%).                                                                                                                                                                           |
| <i>C. aurantium</i>    | Peel              | Broth micro-dilution                | <i>C. albicans</i> (SC 5314)         | >2000 µg/mL             | -      | -                                                                                 | -                                                                                                                                                                                                                    |
|                        |                   |                                     | <i>C. glabrata</i> (ATCC 2001)       | >2000 µg/mL             | -      | -                                                                                 |                                                                                                                                                                                                                      |
|                        |                   |                                     | <i>C. krusei</i> (ATCC 62580)        | >2000 µg/mL             | -      | -                                                                                 |                                                                                                                                                                                                                      |
|                        |                   |                                     | <i>C. orthopsilosis</i> (ATCC 96141) | >2000 µg/mL             | -      | -                                                                                 |                                                                                                                                                                                                                      |
|                        |                   |                                     | <i>C. parapsilosis</i> (ATCC 22019)  | >2000 µg/mL             | -      | -                                                                                 |                                                                                                                                                                                                                      |
|                        |                   |                                     | <i>C. tropicalis</i> (ATCC 13803)    | >2000 µg/mL             | -      | -                                                                                 |                                                                                                                                                                                                                      |
| <i>C. aurantium</i>    | Young Leaf        | Disk difusion                       | <i>C. albicans</i> (ATCC 90028)      | 25.3 ± 0.47 mm          | -      | Fluconazole (20 µg/disk): 18 ± 0.2 mm<br>Amphotericin B (20 µg/disk): 21 ± 0.5 mm | 2-βpinene (100%), δ-3 carene (84%), D-limonene (28%), β -myrcene (18.22%), citronella (11.6%), L-linalool (11.2%), γ -terpinene (9.08%), 3-cyclohexen-1-ol (8.74%), sabinene (5.93 %), citronellyl acetate (5.45 %). |
|                        |                   |                                     | <i>C. albicans</i> (MTCC 277)        | 19 ± 0.02 mm            | -      | Fluconazole (20 µg/disk): 18 ± 0.2 mm<br>Amphotericin B (20 µg/disk): 21 ± 0.5 mm |                                                                                                                                                                                                                      |

|                     |            |                     |                                 |                       |             |                                                                                                             |                                                                                                                                                                                                                     |      |
|---------------------|------------|---------------------|---------------------------------|-----------------------|-------------|-------------------------------------------------------------------------------------------------------------|---------------------------------------------------------------------------------------------------------------------------------------------------------------------------------------------------------------------|------|
| <i>C. aurantium</i> | Young Leaf | Broth microdilution | <i>C. albicans</i> (ATCC 90028) | 0.15% (v/v)           | 0.15% (v/v) | Fluconazole (MIC): 0.15% (v/v); (MFC): 0.15% (v/v)<br>Amphotericin B (MIC): 0.62% (v/v); (MFC): 0.31% (v/v) | 2-βpinene (100%), δ-3 carene (84%), D-limonene (28%), β -myrcene (18.22%), citronella (11.6%), L-linalool (11.2%), γ -terpinene (9.08), 3-cyclohexen-1-ol (8.74%), sabinene (5.93 %), citronellyl acetate (5.45 %). | [19] |
|                     |            |                     | <i>C. albicans</i> (MTCC 277)   | 0.31% (v/v)           | 0.31% (v/v) | Fluconazole (MIC): 0.62% (v/v); (MFC): 0.62% (v/v)<br>Amphotericin B (MIC): 0.62% (v/v); (MFC): 0.31% (v/v) |                                                                                                                                                                                                                     |      |
| <i>C. bergamia</i>  | -          | Broth microdilution | <i>C. albicans</i> (ATCC 18804) | 625 µL/mL             | -           | -                                                                                                           | Limonene (34.6%), linalyl acetate (34.3%), linalool (12.7%), γ -terpinene (6.6%), β-pinene (5.6%).                                                                                                                  | [5]  |
| <i>C. grandis</i>   | Leaves     | Broth microdilution | <i>C. albicans</i> (ATCC 10231) | 4 mg/ mL (4000 µg/mL) | -           | Amphotericin B (20 µg/disk): 12.05 mm<br>Nystatin (20 µg/disk): 12.05 mm                                    | Borneol (42.24%), linalool (26.01%), linalyl acetate (19.89%), terpinen-4-ol (5.24%), fenchyl acetate (4.69%).                                                                                                      | [18] |
| <i>C. grandis</i>   | Peel       | Broth microdilution | <i>C. albicans</i> (ATCC 10231) | 4 mg/ mL (4000 µg/mL) | -           | Amphotericin B: (MIC): 4 mg/mL (4000 µg/mL)<br>Nystatin (MIC): 2 mg/mL (2000 µg/mL)                         | Limonene (75.43%), β -myrcene (3.52%), cycloisositivenene (2.73%), terpinen-4-ol (2.35%), germacrene (2.09%), α -terpinene (2.05%), α -pinene (1.59%), β -pinene (1.57%).                                           | [18] |
|                     |            |                     | <i>C. albicans</i>              | -                     | -           | Amphotericin B (MIC): 4 mg/mL (4000 µg/mL)<br>Nystatin (MIC): 2 mg/mL (2000 µg/mL)                          |                                                                                                                                                                                                                     |      |

|                   |                 |                        |                                 |                               |   |                                                                                                 |                                                                                                                                                                                                                                                                                                                     |      |
|-------------------|-----------------|------------------------|---------------------------------|-------------------------------|---|-------------------------------------------------------------------------------------------------|---------------------------------------------------------------------------------------------------------------------------------------------------------------------------------------------------------------------------------------------------------------------------------------------------------------------|------|
| <i>C. grandis</i> | Peel            | Broth<br>microdilution | <i>C. tropicalis</i> (ATCC 750) | 4 mg/ mL<br>(4000 µg/mL)      | - | Amphotericin B:<br>(MIC): 4 mg/mL<br>(4000 µg/mL)<br>Nystatin<br>(MIC): 2 mg/mL<br>(2000 µg/mL) | Limonene (75.43%), β -myrcene (3.52%), cycloisosativene (2.73%), terpinen-4-ol (2.35%), germacrene (2.09%), α -terpinene (2.05%), α -pinene (1.59%), β -pinene (1.57%).                                                                                                                                             | [18] |
| <i>C. grandis</i> | Leaves          | Broth<br>microdilution | <i>C. albicans</i> (ATCC 10231) | 0.116 ± 0.004% ( <i>v/v</i> ) | - | -                                                                                               | Steam distillation (SD-EO):<br>Citronellal (34.54%), citronellol (16.17%), citronellyl butyrate (10%), β-caryophyllene (8.22%), (-)-β-pinene (7.33%), trans-β-ocimene (6.8%), 3,7,11-tetramethyl bicyclo [8.1.0]2,6-undecadiene (3.43%), phytol (1.65%) e α-farnesene (1.57%), Sabinene (1.43%), dipentene (1.08%). | [20] |
|                   |                 |                        | <i>C. albicans</i> (ATCC 10231) | 0.121 ± 0.007% ( <i>v/v</i> ) | - | -                                                                                               | Solvent-Free Microwave Extraction (SFME-EO): Citronellal (30.87%), citronellol (28.95%), (-)-β-pinene (9.58%), α-ocimene (6.38%), citronellyl butyrate (5.7%), Sabinene (3.01%), β-caryophyllene (2.76%), caryophyllene oxide (2.21%), dipentene (1.93%). spathulenol (1.02%).                                      | [20] |
| <i>C. hystix</i>  | Riped<br>Fruits | Broth<br>microdilution | <i>C. albicans</i> (ATCC 10231) | 1 mg/mL<br>(1000 µg/mL)       | - | Amphotericin B:<br>(MIC): 4 mg/mL<br>(4000 µg/mL)<br>Nystatin<br>(MIC): 2 mg/mL<br>(2000 µg/mL) | Limonene (83.89%), α-Pinene (3.02%).                                                                                                                                                                                                                                                                                | [18] |

|              |        |                      |                          |                            |   |                                                                                                 |                                                                                                                             |      |
|--------------|--------|----------------------|--------------------------|----------------------------|---|-------------------------------------------------------------------------------------------------|-----------------------------------------------------------------------------------------------------------------------------|------|
| C. latifolia | Peel   | Agar difusion        | C. albicans              | 4 mg/mL<br>(4000 µg/mL)    | - | Amphotericin B:<br>(MIC): 4 mg/mL<br>(4000 µg/mL)<br>Nystatin<br>(MIC): 2 mg/mL<br>(2000 µg/mL) | [21]                                                                                                                        |      |
|              |        |                      | C. tropicalis (ATCC 750) | 2 mg/mL<br>(2000 µg/mL)    | - | Amphotericin B:<br>(MIC): 4 mg/mL<br>(4000 µg/mL)<br>Nystatin<br>(MIC): 2 mg/mL<br>(2000 µg/mL) |                                                                                                                             |      |
|              |        |                      | C. albicans              | 0.4 µg/50 mL:<br>9.46 mm.  | - | Amphotericin B<br>(20 µg/disk):<br>12.05 mm                                                     |                                                                                                                             |      |
|              |        |                      | C. glabrata              | 0.22 µg/50 mL:<br>8.52 mm. | - | Amphotericin B<br>(20 µg/disk):<br>12.05 mm                                                     |                                                                                                                             |      |
|              |        |                      | C. guilliermondii        | 0.19 µg/50 mL:<br>8.94 mm. | - | Amphotericin B<br>(20 µg/disk):<br>12.05 mm                                                     |                                                                                                                             |      |
|              |        |                      | C. lusitaniae            | 1.09 µg/50 mL:<br>8.06 mm. | - | Amphotericin B<br>(20 µg/disk):<br>12.05 mm                                                     |                                                                                                                             |      |
| C. latifolia | Peel   | Agar difusion        | C. tropicalis            | 1.3 µg/50 mL:<br>10.87 mm. | - | Amphotericin B<br>(20 µg/disk):<br>12.05 mm                                                     | d-limonene (51.64%), β -thujene (14.85%), γ -terpinene (12.80%), β -pinene (12.79%), α -pinene (2.17%), α -myrcene (1.43%). | [21] |
| C. limon     | -      | Broth micro-dilution | C. albicans (ATCC 18804) | 625 µL/mL                  | - | -                                                                                               | Limonene (56.1%), β-pinene (15.8%), γ -terpinene (10.5%).                                                                   | [5]  |
| C. limon     | Leaves | Broth micro-         | C. albicans (SC 5314)    | 500 µg/mL                  | - | -                                                                                               | -                                                                                                                           | [16] |

|                   |   |                          |                                            |                                                                                                                |                              |            |                                                                                                                                                                                                                                     |      |
|-------------------|---|--------------------------|--------------------------------------------|----------------------------------------------------------------------------------------------------------------|------------------------------|------------|-------------------------------------------------------------------------------------------------------------------------------------------------------------------------------------------------------------------------------------|------|
|                   |   | dilution                 | <i>C. glabrata</i> (ATCC 2001)             | 250 µg/mL                                                                                                      | -                            | -          |                                                                                                                                                                                                                                     |      |
|                   |   |                          | <i>C. krusei</i> (ATCC 62580)              | 500 µg/mL                                                                                                      | -                            | -          |                                                                                                                                                                                                                                     |      |
|                   |   |                          | <i>C. orthopsilosis</i> (ATCC 96141)       | 500 µg/mL                                                                                                      | -                            | -          |                                                                                                                                                                                                                                     |      |
|                   |   |                          | <i>C. parapsilosis</i> (ATCC 22019)        | 500 µg/mL                                                                                                      | -                            | -          |                                                                                                                                                                                                                                     |      |
|                   |   |                          | <i>C. tropicalis</i> (ATCC 13803)          | 250 µg/mL                                                                                                      |                              |            |                                                                                                                                                                                                                                     |      |
| <i>C. limonum</i> | - | Broth micro-dilution     | <i>C. albicans</i> - Fluconazole Resistant | 0.0097–0.312% ( <i>v/v</i> )                                                                                   | 0.0097–0.312% ( <i>v/v</i> ) | -          | -                                                                                                                                                                                                                                   | [12] |
|                   |   |                          | <i>C. glabrata</i> - Fluconazole Resistant | 0.0024–0.1565 ( <i>v/v</i> )                                                                                   | 0.0024–0.156% ( <i>v/v</i> ) | -          |                                                                                                                                                                                                                                     |      |
|                   |   |                          | <i>C. krusei</i> - Fluconazole Resistant   | 0.0024–0.0097% ( <i>v/v</i> )                                                                                  | 0.0024–0.019% ( <i>v/v</i> ) | -          |                                                                                                                                                                                                                                     |      |
| <i>C. limonum</i> |   | Broth microdilution      | <i>C. albicans</i>                         | <0.043 to >21.325 mg/mL                                                                                        | <0.043–>21.325 mg/mL         | 0.06 mg/mL | Citral (53.85%), others (27.18%), limonene (5.29%), terpinolene (4.57%), terpinene (4.49%).                                                                                                                                         | [22] |
|                   |   |                          | <i>C. glabrata</i>                         | <0.044 to 5.331 mg/mL                                                                                          | <0.043–5.331 mg/mL           | -          |                                                                                                                                                                                                                                     |      |
| <i>C. limonum</i> | - | Cylinder-plate diffusion | <i>C. albicans</i>                         | (0.6–3.0%: 0 mm)                                                                                               | -                            | -          | Limonene (48.27%), β-pinene (15.14%), α-pinene (11.06%), trans-citral (7.14%), c-terpinene (4.85%), cis-citral (4.3%), β-myrcene (4.11%), terpinolene (1.19%), geranyl acetate (0.91%).                                             | [23] |
|                   |   |                          | <i>C. glabrata</i>                         | (2.6%: 44.8 mm)<br>(3.0%: 44.8 mm)                                                                             |                              |            |                                                                                                                                                                                                                                     |      |
|                   |   |                          | <i>C. tropicalis</i>                       | (0.6–3.0%: 0 mm)                                                                                               | -                            | -          |                                                                                                                                                                                                                                     |      |
| <i>C. limonum</i> | - | Cylinder-plate diffusion | <i>C. albicans</i>                         | (0.6%: 44.8 mm)<br>(1.0%: 44.8 mm)<br>(1.6%: 44.8 mm)<br>(2.0%: 44.8 mm)<br>(2.6%: 45.0 mm)<br>(3.0%: 45.0 mm) | -                            | -          | Limonene (23.39%), cis-citral (19.41%), trans-citral (15.52%), β-pinene (8.93%), α-caryophyllene (6.09%), c-terpinene (5.87%), cis-geraniol (4.96%), farnesol (4.48%), trans-geraniol (3.39%), β-myrcene (1.46%), α-pinene (1.44%). |      |

|                   |   |                          |                      |                                                                                                            |   |   |                                                                                                                                                                                                                                                                                                                                  |
|-------------------|---|--------------------------|----------------------|------------------------------------------------------------------------------------------------------------|---|---|----------------------------------------------------------------------------------------------------------------------------------------------------------------------------------------------------------------------------------------------------------------------------------------------------------------------------------|
| <i>C. limonum</i> | - | Cylinder-plate diffusion | <i>C. glabrata</i>   | (0.6–3.0%: 0 mm)                                                                                           |   |   |                                                                                                                                                                                                                                                                                                                                  |
|                   |   |                          | <i>C. tropicalis</i> | (2.6%: 15.3 mm)<br>(3.0%: 16.3 mm)                                                                         | - | - |                                                                                                                                                                                                                                                                                                                                  |
|                   |   |                          | <i>C. albicans</i>   | (0.6%: 23 mm)<br>(1.0%: 25 mm)<br>(1.6%: 44.8 mm)<br>(2.0%: 44.8 mm)<br>(2.6%: 44.8 mm)<br>(3.0%: 45.0 mm) | - | - | Limonene (42.03%), $\beta$ -pinene (15.15%), carvone (7.28%), 1-terpinen-4-ol (5.57%), pinocarveol (5.44%), verbenol (4.9%), $\alpha$ -pinene (3.42%), trans-carveol (3.36%), caryophyllene oxide (3.2%), $\alpha$ -bergamotene (2.31%), trans-p-2,8- (1.84%), trans-geraniol (1.58%), trans-verbenol (1.5%).                    |
| <i>C. limonum</i> | - | Cylinder-plate diffusion | <i>C. glabrata</i>   | (2.6%: 44.6 mm)<br>(3.0%: 44.8 mm)                                                                         |   |   |                                                                                                                                                                                                                                                                                                                                  |
|                   |   |                          | <i>C. tropicalis</i> | (0.6–3.0%: 0 mm)                                                                                           | - | - |                                                                                                                                                                                                                                                                                                                                  |
|                   |   |                          | <i>C. albicans</i>   | (3.0%: 17.4 mm)                                                                                            | - | - | Isopropyl myristate (42.78%), limonene (22.42%), bergamol (9.53%), $\beta$ -ionene (7.81%), hydrocinnamic acid (6.54%), farnesol (6.12%), $\beta$ -pinene (2.21%).                                                                                                                                                               |
| <i>C. limonum</i> | - | Cylinder-plate diffusion | <i>C. glabrata</i>   | (0.6–3.0%: 0 mm)                                                                                           |   |   |                                                                                                                                                                                                                                                                                                                                  |
|                   |   |                          | <i>C. tropicalis</i> | (0.6–3.0%: 0 mm)                                                                                           | - | - |                                                                                                                                                                                                                                                                                                                                  |
|                   |   |                          | <i>C. albicans</i>   | (0.6–3.0%: 0 mm)                                                                                           | - | - | Limonene (63.2%), $\beta$ -pinene (14.31%), $\beta$ -myrcene (6.94%), c-terpinene (4.78%), $\alpha$ -pinene (3.61%), linalool (1.73%), citral (mix of isomers) (1.06%).                                                                                                                                                          |
| <i>C. limonum</i> | - | Cylinder-plate diffusion | <i>C. glabrata</i>   | (0.6–3.0%: 0 mm)                                                                                           |   |   |                                                                                                                                                                                                                                                                                                                                  |
|                   |   |                          | <i>C. tropicalis</i> | (0.6–3.0%: 0 mm)                                                                                           | - | - |                                                                                                                                                                                                                                                                                                                                  |
|                   |   |                          | <i>C. albicans</i>   | (0.6–3.0%: 0 mm)                                                                                           | - | - | Limonene (38.5%), $\beta$ -pinene (19.98%), $\beta$ -felandrene (15.03%), $\alpha$ -pinene (5.56%), $\beta$ -myrcene (5.42%), citral (mix of isomers) (2.63%), $\beta$ -bisabolene (1.82%), cis-citral (1.54%), $\beta$ -bergamotene (1.54%), Linalool (1.51%), 3-thujene (1.25%), neryl acetate (1.14%), caryophyllene (1.11%). |

[23]

|                    |      |                        |                                      |                          |   |                                                                                                                              |                                                                                                                         |      |
|--------------------|------|------------------------|--------------------------------------|--------------------------|---|------------------------------------------------------------------------------------------------------------------------------|-------------------------------------------------------------------------------------------------------------------------|------|
| <i>C. nobilis</i>  | Peel | Broth<br>microdilution | <i>C. albicans</i> (SC 5314)         | 2000 µg/mL               | - | -                                                                                                                            | [16]                                                                                                                    |      |
|                    |      |                        | <i>C. glabrata</i> (ATCC 2001)       | 2000 µg/mL               | - | -                                                                                                                            |                                                                                                                         |      |
|                    |      |                        | <i>C. krusei</i> (ATCC 62580)        | >2000 µg/mL              | - | -                                                                                                                            |                                                                                                                         |      |
|                    |      |                        | <i>C. orthopsilosis</i> (ATCC 96141) | >2000 µg/mL              | - | -                                                                                                                            |                                                                                                                         |      |
|                    |      |                        | <i>C. parapsilosis</i> (ATCC 22019)  | >2000 µg/mL              | - | -                                                                                                                            |                                                                                                                         |      |
|                    |      |                        | <i>C. tropicalis</i> (ATCC 13803)    | >2000 µg/mL              | - | -                                                                                                                            |                                                                                                                         |      |
| <i>C. paradisi</i> | -    | Broth<br>microdilution | <i>C. albicans</i> (ATCC 18804)      | 313 µL/mL                | - | -                                                                                                                            | Limonene (91.3%).                                                                                                       | [5]  |
| <i>C. paradisi</i> | -    | Broth<br>microdilution | <i>C. albicans</i>                   | 0.0039–1% ( <i>v/v</i> ) | - | Clotrimazole<br>(MIC): >64 µg/mL<br>Fluconazole<br>(MIC): >64 µg/mL<br>Itraconazole<br>(MIC): >64 µg/mL                      | $\alpha$ -Copaene (0.1 %), $\alpha$ -pinen (0.55 %),<br>$\beta$ -caryophyllene (0.39 %), $\beta$ -cubenene<br>(0.09 %). | [9]  |
| <i>C. paradisi</i> | -    | Broth<br>microdilution | <i>C. glabrata</i> (ATCC 15126)      | 0.007–1% ( <i>v/v</i> )  | - | Clotrimazole<br>(MIC): 8 µg/mL<br>Fluconazole<br>(MIC): 8 µg/mL)<br>Itraconazole<br>(MIC): 1 µg/mL                           | -                                                                                                                       | [14] |
| <i>C. paradisi</i> | -    | Broth<br>microdilution | <i>C. glabrata</i>                   | -                        | - | Clotrimazole<br>(MIC): 0.062 - 8 µg/mL<br>Fluconazole<br>(MIC): 2 - >64 µg/mL<br>Itraconazole<br>(MIC): 0.125 - >64<br>µg/mL | -                                                                                                                       | [14] |

|                                            |               |                        |                                      |             |   |   |                   |      |
|--------------------------------------------|---------------|------------------------|--------------------------------------|-------------|---|---|-------------------|------|
| <i>C. reticulata</i>                       | -             | Broth<br>microdilution | <i>C. albicans</i> (ATCC 18804)      | 625 µL/mL   | - | - | Limonene (91.3%). | [5]  |
| <i>C. reticulata</i>                       | Peel          | Broth<br>microdilution | <i>C. albicans</i> (SC 5314)         | 2000 µg/mL  | - | - | -                 | [16] |
|                                            |               |                        | <i>C. glabrata</i> (ATCC 2001)       | 1000 µg/mL  | - | - |                   |      |
|                                            |               |                        | <i>C. krusei</i> (ATCC 62580)        | 250 µg/mL   |   |   |                   |      |
|                                            |               |                        | <i>C. orthopsilosis</i> (ATCC 96141) | 250 µg/mL   |   |   |                   |      |
|                                            |               |                        | <i>C. parapsilosis</i> (ATCC 22019)  | 1000 µg/mL  | - | - |                   |      |
|                                            |               |                        | <i>C. tropicalis</i> (ATCC 13803)    | 1000 µg/mL  | - | - |                   |      |
| <i>C. reticulata</i><br>var. <i>Blanco</i> | Dry<br>Leaves | Broth<br>microdilution | <i>C. albicans</i> (SC 5314)         | >2000 µg/mL | - | - | -                 | [16] |
|                                            |               |                        | <i>C. glabrata</i> (ATCC 2001)       | 2000 µg/mL  | - | - |                   |      |
|                                            |               |                        | <i>C. krusei</i> (ATCC 62580)        | >2000 µg/mL | - | - |                   |      |
|                                            |               |                        | <i>C. orthopsilosis</i> (ATCC 96141) | 2000 µg/mL  | - | - |                   |      |
|                                            |               |                        | <i>C. parapsilosis</i> (ATCC 22019)  | 2000 µg/mL  | - | - |                   |      |
|                                            |               |                        | <i>C. tropicalis</i> (ATCC 13803)    | >2000 µg/mL | - | - |                   |      |
| <i>C. reticulata</i><br>var. <i>Blanco</i> | Peels         | Broth<br>microdilution | <i>C. albicans</i> (SC 5314)         | 1000 µg/mL  | - | - | -                 | [16] |
|                                            |               |                        | <i>C. glabrata</i> (ATCC 2001)       | 1000 µg/mL  | - | - |                   |      |
|                                            |               |                        | <i>C. krusei</i> (ATCC 62580)        | 500 µg/mL   | - | - |                   |      |
|                                            |               |                        | <i>C. orthopsilosis</i> (ATCC 96141) | 1000 µg/mL  | - | - |                   |      |
|                                            |               |                        | <i>C. parapsilosis</i> (ATCC 22019)  | 1000 µg/mL  | - | - |                   |      |



|                                                    |                 |                        |                                      |                          |   |                                                                                          |                                                                                                                                                                                                                                           |      |
|----------------------------------------------------|-----------------|------------------------|--------------------------------------|--------------------------|---|------------------------------------------------------------------------------------------|-------------------------------------------------------------------------------------------------------------------------------------------------------------------------------------------------------------------------------------------|------|
|                                                    |                 |                        | <i>C. tropicalis</i> (ATCC 13803)    | 2000 µg/mL               |   |                                                                                          |                                                                                                                                                                                                                                           |      |
| <i>C. reticulata</i><br>Blanco var<br><i>cravo</i> | Peels           | Broth<br>microdilution | <i>C. albicans</i> (SC 5314)         | >2000 µg/mL              | - | -                                                                                        | -                                                                                                                                                                                                                                         | [16] |
|                                                    |                 |                        | <i>C. glabrata</i> (ATCC 2001)       | 2000 µg/mL               | - | -                                                                                        |                                                                                                                                                                                                                                           |      |
|                                                    |                 |                        | <i>C. krusei</i> (ATCC 62580)        | >2000 µg/mL              | - | -                                                                                        |                                                                                                                                                                                                                                           |      |
|                                                    |                 |                        | <i>C. orthopsilosis</i> (ATCC 96141) | 2000 µg/mL               | - | -                                                                                        |                                                                                                                                                                                                                                           |      |
|                                                    |                 |                        | <i>C. parapsilosis</i> (ATCC 22019)  | >2000 µg/mL              |   |                                                                                          |                                                                                                                                                                                                                                           |      |
|                                                    |                 |                        | <i>C. tropicalis</i> (ATCC 13803)    | >2000 µg/mL              | - | -                                                                                        |                                                                                                                                                                                                                                           |      |
|                                                    |                 |                        |                                      |                          |   |                                                                                          |                                                                                                                                                                                                                                           |      |
| <i>C. reticulata</i><br>Blanco<br>var <i>cravo</i> | Fresh<br>leaves | Broth<br>microdilution | <i>C. albicans</i> (SC 5314)         | 2000 µg/mL               | - | -                                                                                        | -                                                                                                                                                                                                                                         | [16] |
|                                                    |                 |                        | <i>C. glabrata</i> (ATCC 2001)       | >2000 µg/mL              | - | -                                                                                        |                                                                                                                                                                                                                                           |      |
|                                                    |                 |                        | <i>C. krusei</i> (ATCC 62580)        | >2000 µg/mL              | - | -                                                                                        |                                                                                                                                                                                                                                           |      |
|                                                    |                 |                        | <i>C. orthopsilosis</i> (ATCC 96141) | >2000 µg/mL              | - | -                                                                                        |                                                                                                                                                                                                                                           |      |
|                                                    |                 |                        | <i>C. parapsilosis</i> (ATCC 22019)  | >2000 µg/mL              | - | -                                                                                        |                                                                                                                                                                                                                                           |      |
|                                                    |                 |                        |                                      |                          |   |                                                                                          |                                                                                                                                                                                                                                           |      |
|                                                    |                 |                        | <i>C. tropicalis</i> (ATCC 13803)    | 2000 µg/mL               |   |                                                                                          |                                                                                                                                                                                                                                           |      |
| <i>C. reticulata</i><br>var <i>Blanco</i>          | Riped<br>Fruits | Broth<br>microdilution | <i>C. albicans</i> (ATCC 10231)      | 0.3 mg/mL<br>(300 µg/mL) | - | Amphotericin B (MIC):<br>4 mg/mL (4000 µg/mL)<br>Nystatin (MIC):<br>2 mg/mL (2000 µg/mL) | Limonene (37.55%), β -pinene<br>(13.24%), γ -terpinene (9.11%), β<br>-myrcene (6.85%), terpinen-4-ol<br>(6.32%), cymene (5.21%), α -pinene<br>(4.7%), α -3-carene (3.11%), linoleic<br>acid ethyl ester (2.44%), α -terpineol<br>(1.05%). | [16] |
|                                                    |                 |                        | <i>C. albicans</i>                   | 4 mg/mL<br>(4000 µg/mL)  | - | Amphotericin B (MIC):<br>4 mg/mL (4000 µg/mL)<br>Nystatin (MIC):<br>2 mg/mL (2000 µg/mL) |                                                                                                                                                                                                                                           |      |
|                                                    |                 |                        |                                      |                          |   |                                                                                          |                                                                                                                                                                                                                                           |      |
|                                                    |                 |                        | <i>C. tropicalis</i> (ATCC 750)      | 2 mg/mL<br>(2000 µg/mL)  | - | Amphotericin B (MIC):<br>4 mg/mL (4000 µg/mL)                                            |                                                                                                                                                                                                                                           |      |

|                    |      |                        |                                      |                            |                                         |                                             |                                                                   |
|--------------------|------|------------------------|--------------------------------------|----------------------------|-----------------------------------------|---------------------------------------------|-------------------------------------------------------------------|
|                    |      |                        |                                      |                            | Nystatin (MIC):<br>2 mg/mL (2000 µg/mL) |                                             |                                                                   |
| <i>C. sinensis</i> | Peel | Agar<br>diffusion      | <i>C. albicans</i>                   | 1.68 µg/50 mL:<br>5.51 mm. | -                                       | Amphotericin B<br>(20 µg/disk):<br>12.05 mm | <i>d</i> -limonene (96.046%), $\alpha$ -myrcene<br>(2.796%). [21] |
|                    |      |                        | <i>C. glabrata</i>                   | 0.42 µg/50 mL:<br>5.78 mm. | -                                       | Amphotericin B<br>(20 µg/disk):<br>12.05 mm |                                                                   |
|                    |      |                        | <i>C. guilliermondii</i>             | -                          | -                                       | Amphotericin B<br>(20 µg/disk):<br>12.05 mm |                                                                   |
|                    |      |                        | <i>C. lusitaniae</i>                 | 3.71 µg/50 mL:<br>2.00 mm  | -                                       | Amphotericin B<br>(20 µg/disk):<br>12.05 mm |                                                                   |
|                    |      |                        | <i>C. tropicalis</i>                 | 0.72 µg/50 mL:<br>4.44 mm. | -                                       | Amphotericin B<br>(20 µg/disk):<br>12.05 mm |                                                                   |
| <i>C. sinensis</i> | Peel | Broth<br>microdilution | <i>C. albicans</i> (SC 5314)         | >2000 µg/mL                | -                                       | -                                           | - [16]                                                            |
|                    |      |                        | <i>C. glabrata</i> (ATCC 2001)       | >2000 µg/mL                | -                                       | -                                           |                                                                   |
|                    |      |                        | <i>C. krusei</i> (ATCC 62580)        | >2000 µg/mL                | -                                       | -                                           |                                                                   |
|                    |      |                        | <i>C. orthopsilosis</i> (ATCC 96141) | >2000 µg/mL                | -                                       | -                                           |                                                                   |
|                    |      |                        | <i>C. parapsilosis</i> (ATCC 22019)  | >2000 µg/mL                | -                                       | -                                           |                                                                   |
|                    |      |                        | <i>C. tropicalis</i> (ATCC 13803)    | >2000 µg/mL                |                                         |                                             |                                                                   |

Note: Diameter of inhibition zones includes diameter of disks (6 mm). \* MIC: Minimum inhibitory concentration. \*\* MFC: Minimum fungicidal concentration. ATCC: American Type Culture Collection.

**Table S3.** Anti-*Candida* activity *Cupressus* spp. essential oils and their main components.

| <i>Cupressus</i><br>Species | Part of the<br>Plant     | Antifungal Activity                       |                                                                     |                                                                     |        | Major Components (>1%)                               | Reference                                                                                                                                                                                                                                                                                                              |
|-----------------------------|--------------------------|-------------------------------------------|---------------------------------------------------------------------|---------------------------------------------------------------------|--------|------------------------------------------------------|------------------------------------------------------------------------------------------------------------------------------------------------------------------------------------------------------------------------------------------------------------------------------------------------------------------------|
|                             |                          | Method of<br>Antifungal<br>Susceptibility | Species of <i>Candida</i>                                           | Agar diffusion or<br>MIC *                                          | MFC ** | Comparison Drug<br>Results                           |                                                                                                                                                                                                                                                                                                                        |
| <i>C. lusitanica</i>        | Aerial parts             | Agar disk<br>diffusion                    | <i>C. albicans</i> (ATCC 1098)<br>Collection date: 17 Janu-<br>ary  | 7.5 ± 0.0 mm                                                        | -      | Amphotericin B (10<br>µg/mL/disk):<br>13–15 ± 0.0 mm | [24]<br>Limonene (19.5%), sabinene (17.7%),<br>δ-3-carene (16.8%), α-pinene (13.8%),<br>β-myrcene (2.9%), terpinen-4-ol<br>(2.3%), cadina-3,5-diene (2.3%),<br>γ-terpinene (2%), terpinolene (2%),<br>β-phellandrene (1.9%), α-terpinene<br>(1.3%), trans-pinocarveol (1.3%),<br>cis-thujopsene (1.1%), camphene (1%). |
|                             |                          |                                           | <i>C. albicans</i> (ATCC 1098)<br>Collection date: 17 Feb-<br>ruary | 8.5 ± 0.0 mm                                                        |        |                                                      | α-Pinene (35.7%), sabinene (13.4%),<br>limonene (7.7%), δ-3-carene (7.6%),<br>β-phellandrene (4.6%), β-myrcene<br>(4.4%), umbellulone (3.2%), ter-<br>pinen-4-ol (2.9%), terpinolene (2.5%),<br>γ-terpinene (2.3%), α-terpinene (2%),<br>α-thujene (1.6%), cadina-3,5-diene<br>(1.4%).                                 |
| <i>C. lusitanica</i>        | Leaves<br>-non-flowering | Agar disk<br>diffusion                    | <i>C. albicans</i> (ATCC 9002)                                      | 100%, 10%, 1% ( <i>v/v</i> ):<br>respectively,<br>13 mm, 7 mm, 6 mm | -      | Nystatin (10 µg/disk):<br>22 mm                      | [25]<br>Germacrene D (18.5%), epi-zonarene<br>(8.2%), cis-calamenene (8.2%), ter-<br>pinen-4-ol (6.3%), linalool (6%), um-<br>bellulone (6%), di-epi-α-cedrene<br>(4.9%), α-curcumene (4.1%), limonene<br>(2.3%), α-amorphene (2%),                                                                                    |
|                             |                          |                                           | <i>C. glabrata</i> (IP 35)                                          | 100%, 10%, 1% ( <i>v/v</i> ):<br>respectively,<br>6 mm, 6 mm, 6 mm  | -      | Nystatin (10 µg/disk):<br>23 mm                      | β-caryophyllene (1.5%), linalyl acétate<br>(1.2%), cedrol (1.2%), α-muurolene<br>(1.1).                                                                                                                                                                                                                                |
|                             |                          |                                           | <i>C. krusei</i> (ATCC 6258)                                        | 100%, 10%, 1% ( <i>v/v</i> ):<br>respectively,<br>10 mm, 6 mm, 6 mm | -      | Nystatin<br>(10 µg/disk): 18 mm                      |                                                                                                                                                                                                                                                                                                                        |

|                                           |                         |                        |                                     |                                                                      |                      |                                           |                                                                                                                                                                                                                                                                                                                                     |
|-------------------------------------------|-------------------------|------------------------|-------------------------------------|----------------------------------------------------------------------|----------------------|-------------------------------------------|-------------------------------------------------------------------------------------------------------------------------------------------------------------------------------------------------------------------------------------------------------------------------------------------------------------------------------------|
| <i>C. lusitana</i>                        | Leaves<br>non-flowering | Macrowell<br>dilution  | <i>C. lusitaniae</i> (ATCC 200950)  | 100%, 10%, 1% ( <i>v/v</i> ):<br>respectively,<br>13 mm, 10 mm, 6 mm | -                    | Nystatin<br>(10 µg/disk): 33 mm           | Germacrene D (18.5%), epi-zonarene (8.2%), cis-calamenene (8.2%), terpinen-4-ol (6.3%), linalool (6%), umbellulone (6%), di-epi- $\alpha$ -cedrene (4.9%), $\alpha$ -curcumene (4.1%), limonene (2.3%), $\alpha$ -amorphene (2%), $\beta$ -caryophyllene (1.5%), linalyl acetate (1.2%), cedrol (1.2%), $\alpha$ -muurolene (1.1%). |
|                                           |                         |                        | <i>C. parapsilosis</i> (ATCC 22019) | 100%, 10%, 1% ( <i>v/v</i> ):<br>respectively,<br>7 mm, 6mm, 6 mm    | -                    | Nystatin<br>(10 µg/disk): 24 mm           |                                                                                                                                                                                                                                                                                                                                     |
|                                           |                         |                        | <i>C. tropicalis</i> (ATCC 750)     | 100%, 10%, 1% ( <i>v/v</i> ):<br>respectively,<br>14 mm, 7 mm, 6 mm  | -                    | Nystatin<br>(10 µg/disk): 23 mm           |                                                                                                                                                                                                                                                                                                                                     |
|                                           |                         |                        | <i>C. albicans</i> (ATCC 9002)      | 0.16% ( <i>v/v</i> )                                                 | 0.16% ( <i>v/v</i> ) | Nystatin (MIC): 2 µg/mL; (MFC): 2 µg/mL   |                                                                                                                                                                                                                                                                                                                                     |
|                                           |                         |                        | <i>C. glabrata</i> (IP 35)          | 1.25% ( <i>v/v</i> )                                                 | 1.25% ( <i>v/v</i> ) | Nystatin (MIC): 16 µg/mL; (MFC): 16 µg/mL |                                                                                                                                                                                                                                                                                                                                     |
|                                           |                         |                        | <i>C. krusei</i> (ATCC 6258)        | 1.25% ( <i>v/v</i> )                                                 | 1.25% ( <i>v/v</i> ) | Nystatin (MIC): 4 µg/mL; (MFC): 4 µg/mL   |                                                                                                                                                                                                                                                                                                                                     |
| <i>C. arizonica</i><br>var. <i>glabra</i> | Aerial parts            | Broth<br>microdilution | <i>C. lusitaniae</i> (ATCC 200950)  | 0.62% ( <i>v/v</i> )                                                 | 0.62% ( <i>v/v</i> ) | Nystatin (MIC): 2 µg/mL; (MFC): >2 µg/mL  | $\alpha$ -Pinene (26.53%), umbellulone (15.05%), $\beta$ -cubebene (6.71%), cal-                                                                                                                                                                                                                                                    |
|                                           |                         |                        | <i>C. parapsilosis</i> (ATCC 22019) | 1.25% ( <i>v/vv</i> )                                                | 1.25% ( <i>v/v</i> ) | Nystatin (MIC): 16µg/mL; (MFC): 16µg/mL   |                                                                                                                                                                                                                                                                                                                                     |
|                                           |                         |                        | <i>C. tropicalis</i> (ATCC 750)     | 1.25% ( <i>v/v</i> )                                                 | 1.25% ( <i>v/v</i> ) | Nystatin (MIC): 8 µg/mL; (MFC): 8 µg/mL   |                                                                                                                                                                                                                                                                                                                                     |
| <i>C. arizonica</i><br>var. <i>glabra</i> | Aerial parts            | Broth<br>microdilution | <i>C. albicans</i> (ATCC 18804)     | $5 \times 10^{-2}$<br>(0.05 µL/mL))                                  | -                    | -                                         | [26]                                                                                                                                                                                                                                                                                                                                |

|                                                 |                                       |                        |                                 |                                     |                         |                                                                      |                                                                                                                                                                                               |
|-------------------------------------------------|---------------------------------------|------------------------|---------------------------------|-------------------------------------|-------------------------|----------------------------------------------------------------------|-----------------------------------------------------------------------------------------------------------------------------------------------------------------------------------------------|
|                                                 |                                       |                        | <i>C. dublinensis</i> (CIFO 82) | $1 \times 10^{-2}$<br>(0.01 µL/mL)  | -                       | -                                                                    | manene (4.5%), limonene (4.12%),<br>terpinen-4-ol (4.08%),<br>14-norcadin-5-en-4-one (2.78%),<br>6-terpinene (2.06%), β                                                                       |
|                                                 |                                       |                        | <i>C. glabrata</i> (8D)         | $5 \times 10^{-2}$<br>(0.05 µL/mL)  | -                       | -                                                                    | -sesquiphellandrene (2.01%), camphor<br>(1.83%), sabinene (1.7%), aromaden-<br>drene (1.65%), β -fenchol (1.48%),<br>p-cymene (1.47%), cedrol (1.36%),<br>ionole (1.26%), 6-3-carene (1.02%). |
|                                                 |                                       |                        | <i>C. parapsilosis</i> (28 B)   | $5 \times 10^{-2}$<br>(0.05 µL/mL)) | -                       | -                                                                    |                                                                                                                                                                                               |
|                                                 |                                       |                        | <i>C. tropicalis</i> (IGC 3097) | $1 \times 10^{-3}$<br>(0.001 µL/mL) | -                       | -                                                                    |                                                                                                                                                                                               |
|                                                 |                                       |                        |                                 |                                     |                         |                                                                      |                                                                                                                                                                                               |
| <i>C. arizonica</i><br>var.<br><i>arizonica</i> | Aerial parts                          | Broth<br>microdilution | <i>C. albicans</i> (ATCC 18804) | $5 \times 10^{-2}$<br>(0.05 µL/mL)) | -                       | -                                                                    | α-Pinene (29.76%), umbellulone<br>(11.86%), terpinen-4-ol (5.72%),<br>α-cedrene (4.12%), limonene (4.09%),<br>camphene hydrate (3.82%), β                                                     |
|                                                 |                                       |                        | <i>C. dublinensis</i> (CIFO 82) | $1 \times 10^{-2}$<br>(0.01 µL/mL)  | -                       | -                                                                    | -sesquiphellandrene (3.11%),<br>6-Terpinene (2.86%), camphor (2.68%),<br>sabinene (2.51%), 6-3-Carene (1.72%),<br>p-cymene (1.56%),<br>Labd-(13E)-8,15-diol (1.55%), β                        |
|                                                 |                                       |                        | <i>C. glabrata</i> (8D)         | $1 \times 10^{-2}$<br>(0.01 µL/mL)  | -                       | -                                                                    | -fenchol (1.38%), α-terpinene (1.07%),<br>delta-cadinene (1.04%), α-terpinolene<br>(1.03%), cedrol (1.01%).                                                                                   |
|                                                 |                                       |                        | <i>C. parapsilosis</i> (28 B)   | $1 \times 10^{-2}$<br>(0.01 µL/mL)  | -                       | -                                                                    |                                                                                                                                                                                               |
|                                                 |                                       |                        | <i>C. tropicalis</i> (IGC 3097) | $1 \times 10^{-2}$<br>(0.01 µL/mL)  | -                       | -                                                                    |                                                                                                                                                                                               |
| <i>C. semper-<br/>virens</i>                    | Aerial parts -<br>flowering<br>period | Broth<br>microdilution | <i>C. albicans</i> (ATCC 10231) | $0.42 \pm 0.027$ µL/mL              | $1.319 \pm 0.066$ µL/mL | Nystatin (MIC <sub>90</sub> ): 0.84<br>± 0.062; (MFC):<br>1 ± 0.062  | (+)-Cedrol (74.03%), α-pinene (4.6%),<br>thymol (4.25%), δ-3-carene (3.8%),<br>(-)-caryophyllene oxide (3.31%),<br>(-)-borneol (2.33%), α-cadinol (2.19%).                                    |
|                                                 |                                       |                        | <i>C. glabrata</i>              | <64 µL/mL                           | -                       | Nystatin (MIC <sub>90</sub> ): 0.84<br>± 0.032; (MFC):<br>1 ± 0.045  |                                                                                                                                                                                               |
|                                                 |                                       |                        | <i>C. krusei</i>                | <64 µL/mL                           | -                       | Nystatin (MIC <sub>90</sub> ):<br>1.148 ± 0.065; (MFC):<br>2 ± 0.034 |                                                                                                                                                                                               |

[27]

|                         |        |                        |                                         |                         |                                                              |                                                                                               |                                                                                                                                                                                                                                         |      |
|-------------------------|--------|------------------------|-----------------------------------------|-------------------------|--------------------------------------------------------------|-----------------------------------------------------------------------------------------------|-----------------------------------------------------------------------------------------------------------------------------------------------------------------------------------------------------------------------------------------|------|
|                         |        |                        | <i>C. parapsilosis</i>                  | 0.757 ± 0.067 µL/mL     | 1.64 ± 0.058 µL/mL                                           | Nystatin<br>(MIC <sub>90</sub> /MFC):<br>0.84 ± 0.076 / 1 ± 0.041                             |                                                                                                                                                                                                                                         |      |
| <i>C. semper-vires</i>  | Leaves | Broth<br>microdilution | <i>C. albicans</i> (SC 5314)            | 250 µg/mL               | -                                                            | -                                                                                             | Sabinene (20.3%), citral (20%), ter-<br>pinen-4-ol (15.4%), α-pinene (8%),<br>myrcene (6%), β-cymene (5%), neral<br>(5%), δ-2-carene (4%), γ-terpinene<br>(4%), limonene (3.9%), δ-cadinene<br>(3%), α-terpineol (2.4%), cedrol (2.1%). | [16] |
|                         |        |                        | <i>C. glabrata</i> (ATCC 2001)          | 31.25 µg/mL             | -                                                            | -                                                                                             |                                                                                                                                                                                                                                         |      |
|                         |        |                        | <i>C. krusei</i> (ATCC 62580)           | 62.5 µg/mL              | -                                                            | -                                                                                             |                                                                                                                                                                                                                                         |      |
|                         |        |                        | <i>C. orthopsilosis</i> (ATCC<br>93141) | 31.25 µg/mL             | -                                                            | -                                                                                             |                                                                                                                                                                                                                                         |      |
|                         |        |                        | <i>C. parapsilosis</i> (ATCC<br>22019)  | 62.5 µg/mL              | -                                                            | -                                                                                             |                                                                                                                                                                                                                                         |      |
|                         |        |                        | <i>C. tropicalis</i> (ATCC<br>13803)    | 250 µg/mL               | -                                                            | -                                                                                             |                                                                                                                                                                                                                                         |      |
| <i>C. semper-virens</i> | -      | Broth<br>microdilution | <i>C. albicans</i> (ATCC 18804)         | 625 µg/mL               | -                                                            | -                                                                                             | α-Pinene (49.7%), δ-3-carene (27.0%).                                                                                                                                                                                                   | [5]  |
| <i>C. macrocarpa</i>    | Leaves | Broth<br>microdilution | <i>C. albicans</i> (ATCC 10231)         | 1 mg/mL<br>(1000 µg/mL) |                                                              | Amphotericin B<br>(MIC): 4 mg/mL<br>(4000 µg/mL)<br>Nystatin (MIC): 1,5<br>mg/mL (1500 µg/mL) | α -Pinene (63.2%), cedrol (7.21%), β<br>-myrcene (4.2%), β -pinene (4.1%), γ<br>-terpinene (3.1%), germacrene (1.9%),<br>sabinene (1.56%).                                                                                              | [18] |
|                         |        |                        | <i>C. albicans</i>                      | 2 mg/mL<br>(2000 µg/mL) | 40% of all MFCs<br>were no longer than<br>a higher dilution. | Nystatin (MIC): 4<br>mg/mL (4000 µg/mL)                                                       |                                                                                                                                                                                                                                         |      |
|                         |        |                        | <i>C. tropicalis</i> (ATCC 750)         | 2 mg/mL<br>(2000 µg/mL) |                                                              | Amphotericin B<br>(MIC): 4 mg/mL<br>(4000 µg/mL)<br>Nystatin (MIC): 2<br>mg/mL (2000 µg/mL)   |                                                                                                                                                                                                                                         |      |

Note: Diameter of inhibition zones includes diameter of disks (6 mm). \* MIC: Minimum inhibitory concentration. \*\* MFC: Minimum fungicidal concentration. ATCC: American Type Culture Collection .

**Table S4.** Anti-*Candida* activity of *Litsea* spp. essential oils and their main components.

| <i>Litsea</i><br>Species | Part of the Plant | Antifungal Activity                       |                                        |            |        | Comparison Drug<br>Results          | Major Components (>1%)                                                                                                                                                                                                                                                                                                                           | Reference |
|--------------------------|-------------------|-------------------------------------------|----------------------------------------|------------|--------|-------------------------------------|--------------------------------------------------------------------------------------------------------------------------------------------------------------------------------------------------------------------------------------------------------------------------------------------------------------------------------------------------|-----------|
|                          |                   | Method of<br>Antifungal<br>Susceptibility | Species of <i>Candida</i>              | MIC *      | MFC ** |                                     |                                                                                                                                                                                                                                                                                                                                                  |           |
| <i>L. viridis</i>        | Leaf              | Broth<br>microdilution                    | <i>C. albicans</i> (ATCC<br>10231)     | 128 µg/mL  | -      | Nystatin (MIC):<br>8 µg/mL          | Bicyclogermacrene (25.5%),<br>decanal (14.4%), α-pinene<br>(11.1%), β-pinene (8.3%),<br>aromadendrene (3%), do-<br>decanal (2%), β-elemene<br>(1.9%), limonene (1.8%),<br>methyl (E)-cinnamate (1.5%),<br>germacrene B (1.3%),<br>β-selinene (1.2%),<br>(E)-nerolidol (1.1%),<br>γ-elemene (1%), germacrene<br>D (1%), (E)-γ-bisabolene<br>(1%). | [28]      |
| <i>L. cubeba</i>         | Fruits            | Broth<br>microdilution                    | <i>C. albicans</i> (SC 5314)           | 500 µg/mL  | -      | -                                   | Limonene (37%), neral<br>(31.4%), citral (12%), linalool<br>(4%), α-terpineol (2.3%),<br>α-pinene (2%), β-pinene<br>(2%), β-caryophyllene (1.7%),<br>sabinene (1.3%), myrcene<br>(1.3%), geraniol (1.2%).                                                                                                                                        | [16]      |
|                          |                   |                                           | <i>C. tropicalis</i> (ATCC<br>13803)   | 1000 µg/mL | -      | -                                   |                                                                                                                                                                                                                                                                                                                                                  |           |
|                          |                   |                                           | <i>C. krusei</i> (ATCC 62580)          | 62.5 µg/mL | -      | Amphotericin B<br>(MIC): 1.00 µg/mL |                                                                                                                                                                                                                                                                                                                                                  |           |
|                          |                   |                                           | <i>C. glabrata</i> (ATCC<br>2001)      | 250 µg/mL  | -      | -                                   |                                                                                                                                                                                                                                                                                                                                                  |           |
|                          |                   |                                           | <i>C. parapsilosis</i> (ATCC<br>22019) | 500 µg/mL  | -      | Amphotericin B<br>(MIC): 0.25 µg/mL |                                                                                                                                                                                                                                                                                                                                                  |           |
|                          |                   |                                           | <i>C. parapsilosis</i> (ATCC<br>96141) | 250 µg/mL  | -      | -                                   |                                                                                                                                                                                                                                                                                                                                                  |           |

Note: \* MIC: Minimum inhibitory concentration. \*\* MFC: Minimum fungicidal concentration.

## References

1. Ramadan, M.A.; Shawkey, A.E.; Rabeh, M.A.; Abdellatif, A.O. Promising antimicrobial activities of oil and silver nanoparticles obtained from *Melaleuca alternifolia* leaves against selected skin-infecting pathogens. *J. Herb. Med.* **2020**, *20*, 100289.
2. Noumi, E.; Snoussi, M.; Hajlaoui, H.; Trabelsi, N.; Ksouri, R.; Valentin, E.; Bakhrouf, A. Chemical composition, antioxidant and antifungal potential of *Melaleuca alternifolia* (tea tree) and *Eucalyptus globulus* essential oils against oral *Candida* species. *J. Med. Plants Res.* **2011**, *5*, 4147–4156.
3. Antinori, S.; Milazzo, L.; Sollima, S.; Galli, M.; Corbellino, M. Candidemia and invasive candidiasis in adults: A narrative review. *Eur. J. Intern. Medicine.* **2016**, *34*, 21–28.
4. Rajkowska, K.; Kunicka-Styczyńska, A.; Maroszyńska, M. Selected Essential Oils as Antifungal Agents Against Antibiotic-Resistant *Candida* spp.: In Vitro Study on Clinical and Food-Borne Isolates. *Microb. Drug Resist.* **2017**, *23*, 18–24.
5. Powers, C.N.; Osier, J.L.; McFeeters, R.L.; Brazell, C.B.; Olsen, E.L.; Moriarity, D.M. Antifungal and Cytotoxic Activities of Sixty Commercially-Available Essential Oils. *Molecules* **2018**, *23*, 1549.
6. Serra, E.; Hidalgo-Bastida, L.A.; Verran, J.; Williams, D.; Malic, S. Antifungal Activity of Commercial Essential Oils and Biocides against *Candida albicans*. *Pathogens* **2018**, *7*, 15.
7. Rajkowska, K.; Nowak, A.; Kunicka-Styczyńska, A.; Siadura, A. Biological effects of various chemically characterized essential oils: Investigation of the mode of action against *Candida albicans* and HeLa cells. *RSC Adv.* **2016**, *6*, 97199–97207.
8. de Campos-Rasteiro, V.M.; da Costa, A.C.B.P.; Araújo, C.F.; Barros, P.P.; Rossoni, R.D.; Anbinder, A.L.; Jorge, A.O.C.; Junqueira, J.C. Essential oil of *Melaleuca alternifolia* for the treatment of oral candidiasis induced in an immunosuppressed mouse model. *BMC Complement. Altern. Med.* **2014**, *14*, 489.
9. Bona, E.; Cantamessa, S.; Pavan, M.; Novello, G.; Massa, N.; Rocchetti, A.; Berta, G.; Gamalero, E. Sensitivity of *Candida albicans* to essential oils: are they an alternative to antifungal agents? *J. Appl. Microbiol.* **2016**, *121*, 1530–1545.
10. Ramage, G.; Milligan, S.; Lappin, D.F.; Sherry, L.; Sweeney, P.; Williams, C.; Bagg, J.; Culshaw, S. Antifungal, Cytotoxic, and Immunomodulatory Properties of Tea Tree Oil and Its Derivative Components: Potential Role in Management of Oral Candidosis in Cancer Patients. *Front. Microbiol.* **2012**, *3*, 220.
11. Ninomiya, K.; Maruyama, N.; Inoue, S.; Ishibashi, H.; Takizawa, T.; Oshima, H.; Abe, S. The Essential Oil of *Melaleuca alternifolia* (Tea Tree Oil) and Its Main Component, Terpinen-4-ol Protect Mice from Experimental Oral Candidiasis. *Biol. Pharm. Bull.* **2012**, *35*, 861–865.
12. Szweda, P.; Gucwa, K.; Kurzyk, E.; Romanowska, E.; Dzierżanowska-Fangrat, K.; Zielińska-Jurek, A. Essential Oils, Silver Nanoparticles and Propolis as Alternative Agents Against Fluconazole Resistant *Candida albicans*, *Candida glabrata* and *Candida krusei* Clinical Isolates. *Indian J. Microbiol.* **2015**, *55*, 175–183.
13. Brun, P.; Bernabè, G.; Filippini, R.; Piovan, A. In Vitro Antimicrobial Activities of Commercially Available Tea Tree (*Melaleuca alternifolia*) Essential Oils. *Curr. Microbiol.* **2019**, *76*, 108–116.
14. Massa, N.; Cantamessa, S.; Novello, G.; Ranzato, E.; Martinotti, S.; Pavan, M.; Rocchetti, A.; Berta, G.; Gamalero, E.; Bona, E. Antifungal activity of essential oils against azole-resistant and azole-susceptible vaginal *Candida glabrata* strains. *Can. J. Microbiol.* **2018**, *64*, 647–663.
15. Tullio, V.; Roana, J.; Scalas, D.; Mandras, N. Enhanced Killing of *Candida krusei* by Polymorphonuclear Leucocytes in the Presence of Subinhibitory Concentrations of *Melaleuca alternifolia* and “Mentha of Pancalieri” Essential Oils. *Molecules* **2019**, *24*, 3824.
16. Pedroso, R.D.S.; Balbino, B.L.; Andrade, G.; Dias, M.C.P.S.; Alvarenga, T.A.; Pedroso, R.C.N.; Pimenta, L.P.; Lucarini, R.; Pauletti, P.M.; Januário, A.H.; et al. In Vitro and In Vivo Anti-*Candida* spp. Activity of Plant-Derived Products. *Plants* **2019**, *8*, 494.
17. Ramadan, M.A.; Shawkey, A.E.; Rabeh, M.A.; Abdellatif, A.O. Promising antimicrobial activities of oil and silver nanoparticles obtained from *Melaleuca alternifolia* leaves against selected skin-infecting pathogens. *J. Herb. Med.* **2020**, *20*, 100289.
18. Aumeeruddy-Elalfi, Z.; Gurib-Fakim, A.; Mahomoodally, F. Antimicrobial, antibiotic potentiating activity and phytochemical profile of essential oils from exotic and endemic medicinal plants of Mauritius. *Ind. Crop. Prod.* **2015**, *71*, 197–204.
19. Nidhi, P.; Rolta, R.; Kumar, V.; Dev, K.; Sourirajan, A. Synergistic potential of *Citrus aurantium* L. essential oil with antibiotics against *Candida albicans*. *J. of Ethnopharmacol.* **2020**, *262*, 113135.
20. Tsai, M.-L.; Lin, C.-D.; Khoo, K.A.; Wang, M.-Y.; Kuan, T.-K.; Lin, W.-C.; Zhang, Y.-N.; Wang, Y.-Y. Composition and Bioactivity of Essential Oil from *Citrus grandis* (L.) Osbeck “Mato Peiyu” Leaf. *Molecules* **2017**, *22*, 2154.
21. Ruiz-Pérez, N.J.; González-Ávila, M.; Sánchez-Navarrete, J.; Toscano-Garibay, J.D.; Moreno-Eutimio, M.A.; Sandoval-Hernández, T.; Arriaga-Alba, M. Antimycotic Activity and Genotoxic Evaluation of *Citrus sinensis* and *Citrus latifolia* Essential Oils. *Sci. Rep.* **2016**, *6*, 253–271.



22. Gucwa, K.; Milewski, S.; Dymerski, T.; Szweda, P. Investigation of the Antifungal Activity and Mode of Action of *Thymus vulgaris*, *Citrus limonum*, *Pelargonium graveolens*, *Cinnamomum cassia*, *Ocimum basilicum*, and *Eugenia caryophyllus* Essential Oils. *Molecules* **2018**, *23*, 1116.
23. Białoń, M.; Krzyśko-Łupicka, T.; Koszałkowska, M.; Wieczorek, P.P. The Influence of Chemical Composition of Commercial Lemon Essential Oils on the Growth of *Candida* Strains. *Mycopathologia* **2014**, *177*, 29–39.
24. Tavares, C.S.; Martins, A.; Faleiro, M.L.; Miguel, M.G.; Duarte, L.C.; Gameiro, J.A. Bioproducts from forest biomass: Essential oils and hydrolates from wastes of *Cupressus lusitanica* Mill. and *Cistus ladanifer* L. *Industrial Crops and Products*. **2020**, *144*, 112034.
25. Teke, G.N.; Elisée, K.N.; Roger, K.J. Chemical composition, antimicrobial properties and toxicity evaluation of the essential oil of *Cupressus lusitanica* Mill. leaves from Cameroon. *BMC Complement. Altern. Med.* **2013**, *13*, 130.
26. Khouaja, W.; Oliveira, R.; Raies, A.; Dias, A.C.P. Antifungal activity of the essential oils from *Cupressus arizonica* var. *arizonica* and var. *glabra*. *Ind. Crop. Prod.* **2015**, *77*, 614–623.
27. Ibrahim, T.A.; El-Hela, A.A.; El-Hefnawy, H.M.; Al-Taweel, A.M.; Perveen, S. Chemical Composition and Antimicrobial Activities of Essential Oils of Some Coniferous Plants Cultivated in Egypt. *Iran. J. Pharm. Res.* **2017**, *16*, 328–337.
28. Chau, D.T.M.; Chung, N.T.; Huong, L.T.; Hung, N.H.; Ogunwande, I.A.; Dai, D.N.; Setzer, W.N. Chemical Compositions, Mosquito Larvicidal and Antimicrobial Activities of Leaf Essential Oils of Eleven Species of Lauraceae from Vietnam. *Plants* **2020**, *9*, 606.
